# Supplementary material for: Extraction Optimization, Purification, Antioxidant Activity, and Preliminary Structural Characterization of Crude Polysaccharide from an Arctic Chlorella sp
Source: PubMed Central journal article supplement (PMC6414885; doi:10.3390/polym10030292), 2018-03-09
Supplement: polymers-10-00292-s001.pdf [file polymers-10-00292-s001.pdf]

# Extraction Optimization, Purification, Antioxidant Activity, and Preliminary Structural Characterization of Crude Polysaccharide from an Arctic *Chlorella* Sp.

Hong Song, Meilin He, Chuankun Gu, Dong Wei, Yuqi Liang, Junmei Yan and Changhai Wang \*

Jiangsu Provincial Key Laboratory of Marine Biology, College of Resources and Environmental Science, Nanjing Agricultural University, 1 Tongwei Road, Nanjing 210095, China; songhong8912@163.com (H.S.); hemeilin@njau.edu.cn (M.H.); 2016103007@njau.edu.cn (C.G.); 13260980201@163.com (D.W.); 18931330996@163.com (Y.L.); Ninglyq@163.com (J.Y.)

\* Correspondence: chwang@njau.edu.cn; Tel.: +86-25-8439-6680

## 1. Standard Curve for Analysis of Sulfate Group Content

The sulfate-group ( $-\text{SO}_3\text{H}$ ) content of polysaccharides was determined by the  $\text{BaCl}_2$ -gelatin turbidity method [28,29]. In a typical procedure, 0.3% gelatin solution was prepared in hot water  $70\text{ }^\circ\text{C}$  and stored at  $4\text{ }^\circ\text{C}$  overnight. Two grams of  $\text{BaCl}_2$  was dissolved in gelatin solution and allowed to stand for 2–3 h at  $25\text{ }^\circ\text{C}$ . The preparation of standard solution of  $\text{K}_2\text{SO}_4$ : dried the  $\text{K}_2\text{SO}_4$  powder under  $105\text{ }^\circ\text{C}$ , then accurately weighed 217.8 mg  $\text{K}_2\text{SO}_4$  and dissolved in 200 mL 1 mol/L HCl. The preparation of polysaccharide solution: 8mg extracted polysaccharide was hydrolyzed in 3 mL 1 mol/l HCl for 5 h at  $105\text{ }^\circ\text{C}$  in a sealed glass tube [28]. About 0.20 mL of  $\text{K}_2\text{SO}_4$  standard solution (polysaccharide solution) was added to 3.8 mL of TCA and 1 mL of  $\text{BaCl}_2$ -gelatin reagent, and the mixture was allowed to stand for 10–20 min. A blank was prepared with 0.2 mL of water instead of  $\text{K}_2\text{SO}_4$  standard solution. The released barium sulfate suspension was measured at 360 nm by UV-visible spectrophotometer. The standard curve was shown in Figure S1.

The standard curve was shown in Figure S1. The obtained regression equation is:  $Y = 0.31416x + 0.04545$ ,  $R = 0.99647$ .

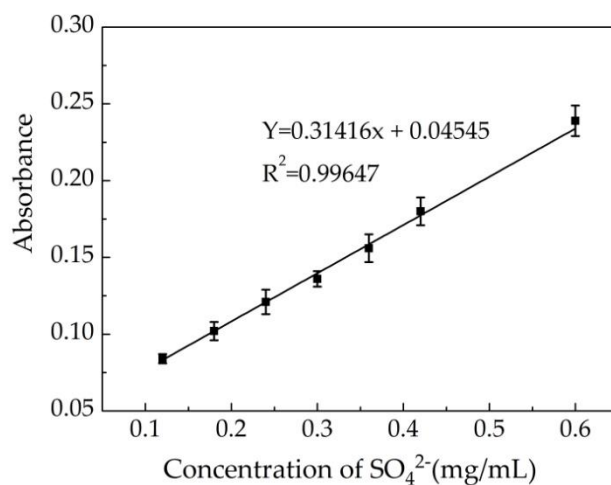

**Figure S1.** Standard curve for determination of sulfate group content in microalgae polysaccharides by

BaCl<sub>2</sub>- gelatin method. Regression equation is:  $Y = 0.31416x + 0.04545$ ,  $R = 0.99647$ .

## 2. UV-VIS spectrum of P-IIa

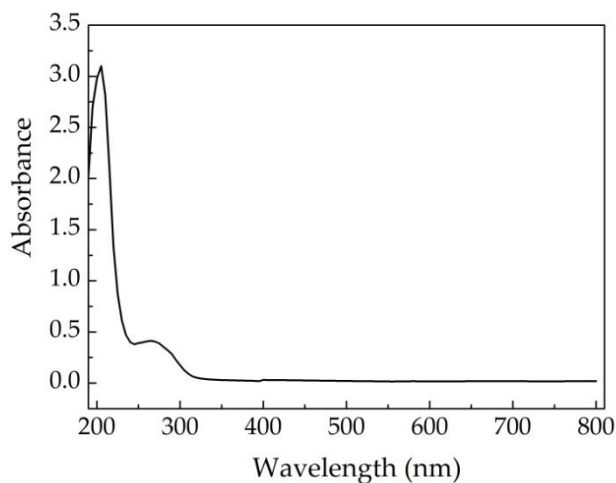

**Figure S2.** UV-VIS spectrum of P-IIa.

**Table S1.** ANOVA of the experimental results of the BBD.

| Source                        | Sum of squares | df | Mean square | F-value | p-value<br>prob >F    |
|-------------------------------|----------------|----|-------------|---------|-----------------------|
| Model                         | 80.70          | 9  | 8.97        | 261.59  | < 0.0001 <sup>a</sup> |
| X <sub>1</sub>                | 4.68           | 1  | 4.68        | 136.58  | < 0.0001 <sup>a</sup> |
| X <sub>2</sub>                | 58.10          | 1  | 50.81       | 1695.06 | < 0.0001 <sup>a</sup> |
| X <sub>3</sub>                | 1.88           | 1  | 1.88        | 54.90   | 0.0001 <sup>a</sup>   |
| X <sub>1</sub> X <sub>2</sub> | 2.02E-003      | 1  | 2.02E-003   | 0.059   | 0.8149                |
| X <sub>1</sub> X <sub>3</sub> | 0.027          | 1  | 0.027       | 0.79    | 0.4024                |
| X <sub>2</sub> X <sub>3</sub> | 0.22           | 1  | 0.22        | 6.31    | 0.0403 <sup>b</sup>   |
| X <sub>1</sub> <sup>2</sup>   | 1.46           | 1  | 1.46        | 42.58   | 0.0003 <sup>a</sup>   |
| X <sub>2</sub> <sup>2</sup>   | 12.66          | 1  | 12.66       | 369.22  | < 0.0001 <sup>a</sup> |
| X <sub>3</sub> <sup>2</sup>   | 0.67           | 1  | 0.67        | 19.53   | 0.0031 <sup>b</sup>   |
| Residual                      | 0.24           | 7  | 0.034       | -       | -                     |
| Lack of fit                   | 0.17           | 3  | 0.057       | 3.36    | 0.1363 <sup>ns</sup>  |
| Pure Error                    | 0.068          | 4  | 0.017       | -       | -                     |
| Cor Total                     | 80.94          | 16 | -           | -       | -                     |
| Std. Dev.                     | 0.19           | -  | -           | -       | -                     |
| C.V.%                         | 2.59           | -  | -           | -       | -                     |
| Adeq-pre                      | 48.733         | -  | -           | -       | -                     |

---

|                     |        |   |   |   |   |
|---------------------|--------|---|---|---|---|
| R <sup>2</sup>      | 0.9970 | - | - | - | - |
| Adj R <sup>2</sup>  | 0.9932 | - | - | - | - |
| Pred R <sup>2</sup> | 0.9647 | - | - | - | - |

---

<sup>ns</sup> not significant; <sup>a</sup> significant at  $p < 0.001$ ; <sup>b</sup> significant at  $p < 0.05$
